# Targetable genetic alterations of *TCF4* (E2-2) drive immunoglobulin expression in the activated B-cell subtype of diffuse large B-cell lymphoma

*Running title: Targeting TCF4 (E2-2) in ABC-like DLBCL*

Neeraj Jain<sup>1#</sup>, Keenan Hartert<sup>2#</sup>, Saber Tadros<sup>1,2#</sup>, Warren Fiskus<sup>3</sup>, Ondrej Havranek<sup>1,4</sup>, Man-Chun John Ma<sup>1</sup>, Alyssa Bouska<sup>5</sup>, Tayla Heavican<sup>5</sup>, Dhiraj Kumar<sup>6</sup>, Qing Deng<sup>1</sup>, Dalia Moore<sup>2</sup>, Christine Pak<sup>7</sup>, Chih Long Liu<sup>8</sup>, Andrew Gentles<sup>9</sup>, Elena Hartmann<sup>10,11</sup>, Robert Kridel<sup>12</sup>, Karin Ekstrom Smedby<sup>13</sup>, Gunnar Juliusson<sup>14</sup>, Richard Rosenquist<sup>15</sup>, Randy D. Gascoyne<sup>16</sup>, Andreas Rosenwald<sup>10,11</sup>, Filippo Giancotti<sup>6</sup>, Sattva S. Neelapu<sup>1</sup>, Jason Westin<sup>1</sup>, Julie Vose<sup>17</sup>, Matthew Lunning<sup>17</sup>, Timothy Greiner<sup>5</sup>, Scott Rodig<sup>7</sup>, Javeed Iqbal<sup>5</sup>, Ash Alizadeh<sup>8</sup>, R. Eric Davis<sup>1</sup>, Kapil Bhalla<sup>3</sup>, Michael R. Green<sup>1,18\*</sup>

<sup>1</sup>Department of Lymphoma/Myeloma, University of Texas MD Anderson Cancer Center, Houston, TX, USA; <sup>2</sup>Eppley Institute for Research in Cancer and Allied Diseases, University of Nebraska Medical Center, Omaha, NE, USA; <sup>3</sup>Department of Leukemia, University of Texas MD Anderson Cancer Center, Houston, TX, USA; <sup>4</sup>BIOCEV, First Faculty of Medicine, Charles University, 25250 Vestec, Czech Republic; <sup>5</sup>Department of Pathology and Microbiology, University of Nebraska Medical Center, Omaha, NE, USA; <sup>6</sup>Department of Cancer Biology, University of Texas MD Anderson Cancer Center, Houston, TX, USA; <sup>7</sup>Department of Pathology, Brigham and Womens Hospital, Harvard Medical School, Boston, MA, USA; <sup>8</sup>Division of Oncology, Department of Medicine, Stanford University, Stanford, CA, USA; <sup>9</sup>Department of Medicine and Biomedical Data Sciences, Stanford University, Stanford, CA, USA; <sup>10</sup>Institute of Pathology, University of Würzburg, Würzburg, Germany; <sup>11</sup>Comprehensive Cancer Center Mainfranken, Würzburg, Germany; <sup>12</sup>Princess Margaret Cancer Center, University of Toronto, Toronto, ON, Canada; <sup>13</sup>Department of Medicine Solna, Clinical Epidemiology Unit, Karolinska Institutet, and Hematology Center, Karolinska University Hospital, Stockholm, Sweden; <sup>14</sup>Department of Laboratory Medicine, Stem Cell Center, Lund University, Lund, Sweden; <sup>15</sup>Department of Molecular Medicine and Surgery, Karolinska Universitetssjukhuset, Stockholm, Sweden; <sup>16</sup>Center for Lymphoid Cancer, British Columbia Cancer Agency, Vancouver, BC, Canada; <sup>17</sup>Division of Hematology and Oncology, Department of Internal Medicine, University of Nebraska Medical Center, Omaha, NE, USA.; <sup>18</sup>Department of Genomic Medicine, University of Texas MD Anderson Cancer Center, Houston, TX, USA. (#Equally contributed, \*Corresponding author)

\* To whom correspondence should be addressed:

Dr. Michael Green

Department of Lymphoma/Myeloma,

University of Texas MD Anderson Cancer Center,

Houston, TX 77030, USA

Phone: +1-713-745-4244

Email: [mgreen5@mdanderson.org](mailto:mgreen5@mdanderson.org)

## ABSTRACT

The activated B-cell (ABC) subtype of diffuse large B-cell lymphoma (DLBCL) is characterized by the chronic activation of signaling initiated by immunoglobulin- $\mu$  (IgM). By analyzing DNA copy profiles of 1,000 DLBCLs, we identified gains of 18q21.2 as the most frequent genetic alteration in ABC-like DLBCL. We show that these alterations target the *TCF4* (E2-2) transcription factor, and that over-expression of *TCF4* leads to its occupancy on immunoglobulin gene enhancers and increased expression of IgM at the transcript and protein level. The *TCF4* gene is one of the top BRD4-regulated genes in DLBCL. Using a BET proteolysis-targeting chimera (PROTAC) we show that TCF4 and IgM expression can be extinguished, and ABC-like DLBCL cells can be killed *in vitro* and *in vivo*. This highlights a novel genetic mechanism for promoting immunoglobulin signaling in ABC-like DLBCL and provides a functional rationale for the use of BET inhibitors in this disease.

Key words: DLBCL, TCF4, IgM

## 1 INTRODUCTION

2 Diffuse large B-cell lymphoma (DLBCL) is the most common form of lymphoma and is curable in  
3 ~60% of patients using a combination chemo-immunotherapy regimen, R-CHOP<sup>1,2</sup>. However,  
4 those that are refractory to, or relapse following, first-line therapy have a dismal outcome<sup>3</sup>.  
5 Chimeric antigen receptor (CAR)-T cells are likely to change the landscape of outcomes in  
6 relapsed/refractory patients, but a large number of patients are not eligible for CAR-T therapy and  
7 ~50% of those that received CAR-T progress within 12 months<sup>4</sup>. Novel rationally-targeted  
8 therapeutic strategies are therefore needed for DLBCL.

9  
10 The clinical heterogeneity of DLBCL is underpinned by molecular heterogeneity, with the major  
11 distinction being between the germinal center B-cell (GCB)-like and activated B-cell (ABC)-like  
12 'cell of origin' (COO) subtypes that were identified by gene expression profiling<sup>5</sup>. The GCB-like  
13 subtype shows transcriptional similarities to normal germinal center B-cells, whereas the ABC-  
14 like subtype shows transcriptional similarities to CD40-activated B-cells or plasmablasts. Patients  
15 with ABC-like DLBCL have significantly worse overall survival compared to patients with GCB-  
16 like DLBCL, when treated with the standard-of-care combination chemotherapy (CHOP) plus  
17 rituximab (R-CHOP) regimen<sup>6</sup>. The ABC-like DLBCL subtype expresses immunoglobulin  $\mu$  (IgM)<sup>7</sup>  
18 in >90% of cases, which forms the B-cell receptor (BCR) signaling complex in association with  
19 CD79A and CD79B and drives chronically active BCR signaling. Several genetic alterations have  
20 been shown to promote this signaling, including mutations of the *CD79A*, *CD79B*, *CARD11*, and  
21 *MYD88* genes<sup>8-11</sup>. However, these mutations only account for approximately two thirds of ABC-  
22 like DLBCL cases<sup>12</sup>, suggesting that other significant genetic drivers remain to be defined.

23  
24 A common mechanism for tumorigenesis is the gain or loss of DNA encoding oncogenes or tumor  
25 suppressor genes, respectively. These copy number alterations (CNAs) perturb a higher fraction  
26 of the cancer genome than somatic nucleotide variants (SNVs) and small insertion/deletions  
27 (InDels) and are critically important to cancer etiology<sup>13</sup>. Here, we have integrated multiple  
28 datasets, including DNA copy number profiles of 1,000 DLBCLs, and identified DNA copy number  
29 gain of the E2 transcription factor *TCF4* as the most frequent genetic alteration in ABC-like  
30 DLBCL. We show that *TCF4* is capable of driving IgM expression and is amenable to therapeutic  
31 targeting through BET inhibition. These data therefore highlight a novel genetic basis for ABC-  
32 like DLBCL with potential implications for future clinical studies.

33

34

## 35 RESULTS

### 36 DNA copy number gains of chromosome 18 are the most frequent genetic alteration in DLBCL.

37 In order to identify significant CNAs in DLBCL, we interrogated the genomic profiles of 1,000  
38 DLBCLs using the GISTIC2 algorithm<sup>14</sup>. These included high-resolution SNP microarrays from  
39 860 previously published cases, in addition to next generation sequencing (NGS)-derived profiles  
40 from our own cohort of 140 cases (Table S1-2). Our analysis revealed 20 significant DNA copy  
41 number gains and 21 significant DNA copy number losses (false discovery rate [FDR] <0.1; Fig.  
42 1A and Table S3). Using a subset of 448 cases for which COO subtype data was available, we  
43 identified 9 DNA copy number alterations that were significantly more frequent in ABC-like DLBCL  
44 and 11 that were significantly more frequent in GCB-DLBCL (Fisher Q-value<0.1; Fig. 1B and S1;  
45 Table S4). The most frequent genetic alteration in ABC-like DLBCL was gain of 18q21.2, which  
46 was observed in 44% of tumors. In line with the association with ABC-like DLBCL, 18q21.2 gains  
47 were associated with significantly reduced overall survival in both CHOP and R-CHOP treated  
48 patients (Fig 1C-D). Using 199 tumors with matched COO subtype, DNA copy number data and  
49 mutation status for 40 genes, we observed that the frequency of 18q21 gains (23.1% of all tumors;  
50 40.7% of ABC-like tumors) was higher than other ABC-like DLBCL-associated somatic mutations  
51 including *MYD88* mutation (16.6% of all tumors; 33.3% of ABC-like tumors), *CD79B* mutation  
52 (7.5% of all tumors; 18.5% of ABC-like tumors) and other ABC-associated genes (Fig 1E, S2 and  
53 Table S5). Because multiple genetic alterations are associated with ABC-like DLBCL, we  
54 employed the REVEALER algorithm<sup>15</sup> to identify the set of genetic alterations that best explained  
55 the ABC-like DLBCL signature. Using a set of 87 DNA copy number alterations and recurrently  
56 mutated genes as the feature set and *MYD88* mutations as the seed feature, REVEALER  
57 identified an additional 4 genetic alterations including 18q21.2 gain as those best associating with  
58 the ABC-like signature (Fig. 1F). Gains of 18q21 are therefore the most frequent genetic feature  
59 of ABC-like DLBCL and are predicted to contribute to this molecular phenotype.

60

### 61 The TCF4 (E2-2) transcription factor is the target of 18q21 gains in ABC-like DLBCL

62 Gains of 18q have been previously attributed to the *BCL2* oncogene<sup>16,17</sup>. However, our analysis  
63 of this large cohort provided the resolution to identify two significant peaks of DNA copy gain on  
64 chromosome 18; 18q21.2 (16 genes,  $Q=4.8 \times 10^{-14}$ ) and 18q22.1 (70 genes,  $Q=1.1 \times 10^{-7}$ ; Table  
65 S3). We further integrated GEP data from 249 tumors to identify the likely targets of these lesions  
66 by testing for the increase in expression of genes within the most significant peaks of DNA copy  
67 gain. This highlighted *TCF4* and *BCL2* as likely targets of the 18q21.2 and 18q22.1 gains,  
68 respectively (Fig. 2A; Table S6). Notably, most 18q copy number alterations incorporated both of



69 these genes (Fig 2A-C). Only 7.3% or 1.0% of ABC-like DLBCLs have copy number alterations  
70 targeting *TCF4* or *BCL2* alone, respectively (Fig. 2B-C). In addition, we observed that *TCF4* was  
71 more highly expressed in ABC-like DLBCL compared to GCB-like DLBCL generally, but was  
72 further increased by DNA copy gain (Fig 2D). In line with this, ABC-like DLBCL cell lines  
73 expressed TCF4 protein irrespective of DNA copy number, but these levels were significantly  
74 increased by DNA copy gain (Fig 2E).

75  
76 The *TCF4* gene encodes an E2 family transcription factor, E2-2. Mutations of another E2  
77 transcription factor, *TCF3*, and its negative regulators *ID2* and *ID3* are frequent in Burkitt's  
78 lymphoma (BL) and promote immunoglobulin signaling<sup>18,19</sup>. We therefore interrogated the  
79 mutation status of these genes and *TCF4* copy gains in our cohort of 140 DLBCLs and a prior  
80 cohort of 108 BLs that were sequenced and analyzed with the same approach<sup>20</sup>. We did not  
81 observe recurrent mutations of *TCF4* or *ID2* in this BL cohort, and mutations of *TCF3* and *ID3*  
82 were infrequent in DLBCL (data not shown). However, in BL, gains of *TCF4* were present at the  
83 same frequency as *TCF3* mutations (18%). Furthermore, *TCF4* gains were significantly mutually-  
84 exclusive from *TCF3* and *ID3* mutations (Fisher P=0.019; Fig. 2F), suggesting that *TCF4* gains  
85 may serve a similar function as *TCF3/ID3* mutations in promoting immunoglobulin signaling.  
86 These data therefore show that the *TCF4* gene is highly expressed in ABC-like DLBCL, with  
87 expression further promoted by frequent 18q21.2 DNA copy gains, and implicates *TCF4* in  
88 immunoglobulin signaling.

89

#### 90 *TCF4* regulates *IgM* and *MYC* expression in ABC-like DLBCL

91 To identify potential target genes of TCF4, we performed differential gene expression analysis of  
92 primary DLBCL tumors with TCF4 DNA copy gain (n=51) compared to those without (n=59). This  
93 analysis was limited to ABC-like tumors so as to eliminate the confounding effect of genes that  
94 differ in expression between COO subtypes. A total of 355 genes (472 probe-sets) and 87 genes  
95 (107 probe-sets) were found to be expressed at significantly higher or lower levels in tumors with  
96 *TCF4* gain, respectively (Q<0.1, fold-change≥1.2; Fig 3A; Table S7). We performed ChIP-seq of  
97 ABC-like DLBCL cell lines, SUDHL2 and TMD8, with tetracycline-inducible Myc-DDK-tagged  
98 *TCF4* in order to define whether these genes were direct transcriptional targets of TCF4 (Fig 3A).  
99 Importantly, *TCF4* was expressed at a level comparable to that in the U2932 cell line with TCF4  
100 copy gain (Fig. S3). Using the intersection of significant peaks from both cell lines, we identified  
101 TCF4 binding proximal to 180/355 genes with increased expression and 46/87 genes with  
102 decreased expression in tumors with TCF4 copy gain (Fig. 3A-B; Table S8). These peaks showed

103 a highly significant enrichment of motifs containing E-box consensus sequences (CANNTG; Fig.  
104 S4), and many of the same regions are also bound by TCF4 in plasmacytoid dendritic cell  
105 neoplasms<sup>21</sup> (Fig. S4), providing strong evidence that we detected on-target binding. Among the  
106 most significant ChIP-seq peaks were those within the immunoglobulin heavy chain locus (Fig.  
107 3B), in line with the significantly higher expression of *IGHM* in ABC-like DLBCL tumors with *TCF4*  
108 copy gain (Fig. 3C). This included peaks immediately upstream and downstream of the *IGHM* and  
109 *IGHD* genes, respectively, in regions with corresponding H3K27Ac in normal CD20+ B-cells that  
110 indicates they are *bona fide* enhancers (Fig. 3D). Tetracycline-inducible expression of *TCF4* in  
111 ABC-like DLBCL cell lines led to a marked increase in *IGHM* at the transcript (Fig. 3E) and protein  
112 level (Fig. 3F). In comparison, *BCL2* expression was not induced by *TCF4* over-expression and  
113 *MYC* induction was restricted to the two cell lines that lacked *MYC* translocation (SUDHL2 and  
114 TMD8; Fig. S5). These data show that IgM is a direct target of *TCF4* and can be induced by its  
115 over-expression in ABC-like DLBCL.

116

117 TCF4 can be targeted by the BET proteolysis-targeting chimera (PROTAC), ARV771.

118 The *TCF4* gene is one of the most highly BRD4-loaded genes in DLBCL, including in ABC-like  
119 DLBCL cell lines with *TCF4* copy gain (Fig. S6). We therefore evaluated small molecule BET  
120 inhibitors and a BET protein degrader, ARV771, as a potential avenue for reducing *TCF4*  
121 expression in ABC-like DLBCL cell lines with high-copy number of *TCF4*. The small molecule BET  
122 inhibitors, JQ1 and OTX015, resulted in an up-regulation of BRD4 that was not observed with  
123 ARV771 due to its role as a sub-stoichiometric BRD4 degrader (Fig 4A and S7). This was  
124 associated with a greater efficacy of ARV771 in reducing the BRD4 target genes, *MYC* and *TCF4*  
125 (Fig 4A), and the ability of ARV771 to induce apoptosis of these cell lines (Fig 4B). However, as  
126 *MYC* is also a target of *TCF4*, the down-regulation of *MYC* is likely partially mediated through  
127 *TCF4*.

128

129 Reductions of *TCF4* by ARV771 treatment were accompanied by reduced expression of the *TCF4*  
130 target genes. This included significant reductions of IgM at the transcript and protein level (Fig.  
131 4C-D and Table S9). ARV771 treatment led to significant down-regulation of the set of genes that  
132 were identified as being increased in association with *TCF4* DNA copy number gain in primary  
133 tumors (Fig. 4E). The promising *in vitro* activity of ARV771 led us to test whether this compound  
134 would be efficacious *in vivo*. In xenografts of the U2932 (Fig. 4F-I) and RIVA (Fig. 4J-M) cell lines  
135 that express high levels of *TCF4*, we observed that ARV771 was able to significantly reduce tumor  
136 growth. At the end of treatment, tumors were significantly smaller in ARV771-treated mice and

137 this led to a significant prolongation of survival in these mice (Log Rank P-value < 0.05). Together  
138 these data demonstrate a clear functional rationale for BET inhibition in ABC-like DLBCL, and  
139 show that ARV771 is effective at eliminating TCF4 and its target genes and treating ABC-like  
140 DLBCL *in vivo*.

141

## 142 **DISCUSSION**

143 The ABC-like subtype is one of two major molecular subtypes of DLBCL that is recognized by the  
144 WHO classification<sup>22</sup>. These tumors are driven by chronic active B-cell receptor signaling that  
145 emanates from autoreactive IgM that is localized to the cell surface and intracellular lysosomes<sup>8,23-</sup>  
146 <sup>25</sup>. Mutations in *CD79B* and *MYD88* deregulate this signaling through the reduction of LYN-  
147 mediated negative feedback and by activation of IRAK signaling, respectively<sup>8,10</sup>. However, recent  
148 murine studies have shown that *MYD88* mutation alone drove a phenotype that was reminiscent  
149 of peripheral tolerance, and this was only relieved by the combination of *MYD88* and *CD79B*  
150 mutations together, or by increased expression of surface IgM<sup>26</sup>. The ABC-like phenotype is  
151 therefore the result of cumulative epistatic genetic alterations, rather than a single dominant driver  
152 mutation. In further support of this notion, recent genomic studies have defined co-associated  
153 sets of genetic alterations that co-segregate with unique genetic subsets of ABC-like DLBCL<sup>27</sup>.  
154 The “cluster 5” subset of ABC-like DLBCL included frequent *MYD88* and *CD79B* mutations, but  
155 the most frequent genetic alteration in this subtype was DNA copy number gain of 18q<sup>27</sup>.

156

157 We identified the *TCF4* (aka E2-2) gene as the most significant target of 18q DNA copy number  
158 gains in DLBCL. The *TCF4* gene (aka E2-2) is closely related to *TCF3* (aka E2A), with both  
159 encoding helix-loop-helix transcription factors that form dimers and recognize E-box consensus  
160 sequences (CANNTG)<sup>28</sup>. Murine conditional knock-out studies showed that TCF3 and TCF4 are  
161 critical regulators of germinal center B-cell and plasma cell development, in part due to their role  
162 in activating immunoglobulin heavy- and light-chain enhancer elements<sup>29,30</sup>. The ID2 and ID3  
163 proteins bind to and inhibit the activity of TCF3 and TCF4 by preventing their dimerization and  
164 DNA binding<sup>28</sup>. The *TCF3* and *ID3* genes are recurrently mutated in another form of B-cell  
165 lymphoma, Burkitt Lymphoma, with the mutations residing in the interface between *TCF3* and *ID3*  
166 and preventing their interaction<sup>18,19</sup>. Mutations in *ID3* are approximately twice as frequent as  
167 mutations of *TCF3*, and presumably also reduce the interaction between ID3 and TCF4  
168 considering the high degree of homology between these two proteins. We observed that TCF4  
169 DNA copy number gains are also frequent in Burkitt lymphoma, and that they mutually exclude  
170 *TCF3* and *ID3* mutations, providing further evidence for the importance of *TCF3/TCF4*

171 deregulation in this disease. In contrast to Burkitt lymphoma, *TCF3* and *ID3* mutations are rare in  
172 ABC-like DLBCL, but *TCF4* DNA copy number gains are present at more than twice the  
173 frequency. In line with the murine studies, we observed a marked up-regulation of IgM transcript  
174 expression in primary tumors with *TCF4* DNA copy number gain. We also identified binding sites  
175 for TCF4 in the immunoglobulin heavy chain locus and showed that induced expression of TCF4  
176 was sufficient for increasing the expression of IgM at the transcript and protein level. Together,  
177 this provides strong evidence for a functional role of TCF4 in promoting IgM expression in ABC-  
178 like DLBCL. This is particularly important in this disease, because >90% of ABC-like DLBCL cases  
179 express IgM and the disease etiology centers on pathogenic signaling downstream of this  
180 receptor<sup>7,8</sup>. Notably, *TCF4* was more highly expressed in ABC-like DLBCL compared to GCB-like  
181 DLBCL generally, even in cases without DNA copy number gain of the locus. This suggests that  
182 this axis may be active in all ABC-like DLBCLs, and further enhanced in the ~40% that harbor  
183 18q DNA copy number gains. This is akin to the role of EZH2 in GCB-like DLBCL, which promotes  
184 the survival and proliferation of all germinal center B-cells but has enhanced activity in the context  
185 of hypomorphic somatic mutations<sup>31,32</sup>. We therefore hypothesize that *TCF4* may participate in a  
186 critical functional axis of immunoglobulin regulation in all ABC-like DLBCL.

187  
188 Proteins in the BET family, including BRD4, are attractive therapeutic targets in cancer due to  
189 their role in the transcriptional activation of oncogenes such as *MYC*<sup>33,34</sup>. In DLBCL, BRD4 targets  
190 include key transcription factors such as *BCL6*, *PAX5* and *IRF4*<sup>35</sup>. We have highlighted *TCF4* as  
191 another prominent target of BRD4 in DLBCL, as has been previously described in plasmacytoid  
192 dendritic cell neoplasms<sup>21</sup>. Due to the difficulty in directly drugging transcription factors, BET  
193 inhibition therefore represents a logical avenue for reducing TCF4 expression in ABC-like DLBCL.  
194 Notably, cell line studies have shown that the small molecule BET inhibitor OTX015 induces  
195 apoptosis in ABC-like DLBCL cell lines, as compared to a predominantly cytostatic effect in GCB-  
196 like DLBCL cell lines<sup>36</sup>. However, small molecule inhibitors have also been shown to result in the  
197 up-regulation of BRD4 expression<sup>37</sup>. We therefore evaluated a novel BET protein PROTAC, ARV-  
198 771, which combines a BET-targeting warhead from OTX015 with a moiety that recruits the VHL  
199 ubiquitin ligase<sup>37</sup>. Because the PROTAC is not degraded, this results in sub-stoichiometric  
200 proteolysis of BET proteins, including BRD4. We found that ARV-771 was able to inhibit the  
201 expression of TCF4 at 10-fold lower concentrations than small molecule BET inhibitors. The  
202 inhibition of TCF4 expression in ABC-like DLBCL cell lines with high TCF4 copy number was  
203 accompanied by the coordinate down-regulation of genes that were highly expressed in primary  
204 tumors with TCF4 DNA copy gain, suggesting that a subset of the broad transcriptional changes

205 associated with BRD4 degradation were the consequence of reduced TCF4. This was also  
206 associated with the induction of apoptosis at low nanomolar doses of ARV-771, significant  
207 reduction of tumor growth *in vivo*, and a significant prolongation in the life of tumor-bearing  
208 animals. Together, this highlights *TCF4* DNA copy gains as a functional rationale for BET  
209 inhibition in ABC-like DLBCL and shows that the BET PROTAC ARV-771 has significant activity  
210 in this context. The over-expression of *BCL2* has been described as a resistance mechanism for  
211 BET inhibitors<sup>38</sup>. We observed that the majority of 18q DNA copy number gains in DLBCL  
212 encompass both the *TCF4* and the *BCL2* gene, and we therefore posit that the promising activity  
213 of BET inhibitors in ABC-like DLBCL may be further enhanced by combination with a *BCL2*  
214 inhibitor such as Venetoclax. In support of this, BET inhibitors have been shown to act  
215 synergistically with Venetoclax in myeloid leukemia<sup>38</sup> and in another form of B-cell lymphoma,  
216 mantle cell lymphoma<sup>39</sup>. Combination of BET and *BCL2* inhibition therefore represents an  
217 attractive therapeutic avenue for future investigation in ABC-like DLBCL.

218

219 In conclusions, we have identified DNA copy number gains of *TCF4* as the most frequent genetic  
220 alteration in ABC-like DLBCL. Increased expression of *TCF4* leads to its occupancy on IgM  
221 enhancer elements and increased expression of IgM at the transcript and protein level. We have  
222 shown that BET-targeting PROTACs efficiently reduce the expression of *TCF4* and its target  
223 genes, induce apoptosis in ABC-like DLBCL cells, and prolong the life of mice bearing ABC-like  
224 DLBCL tumors. This study therefore highlights the BRD4-regulated *TCF4* and IgM axis as a  
225 functional rationale for the use of BET inhibitors in ABC-like DLBCL.

226

## 227 **MATERIALS AND METHODS**

### 228 DNA copy number data acquisition and processing

229 Publicly available data for single nucleotide polymorphism microarrays and array comparative  
230 genome hybridization platforms with >200,000 markers were downloaded from the gene  
231 expression omnibus<sup>16,17,40-46</sup> (Table S1; [www.ncbi.nlm.nih.gov/geo/](http://www.ncbi.nlm.nih.gov/geo/)). These included Affymetrix  
232 250K and SNP 6.0 platforms, and the Agilent 244K platform. For Affymetrix microarrays, raw CEL  
233 files were extracted and copy number predicted using the Affymetrix Copy Number Analysis for  
234 Genechip (CNAG) tool, with reference to data from 100 Caucasian HapMap samples. Agilent data  
235 was analyzed using BioConductor, as previously described<sup>17</sup>. Data for all arrays were represented  
236 as Log<sub>2</sub> copy number change and segmented using the circular binary segmentation (CBS) tool  
237 in GenePattern<sup>47</sup>. Peaks of significant DNA copy number loss and gain were identified using

238 GISTIC2.0<sup>14</sup>. The thresholds utilized for DNA copy number gain and loss were 0.2 copies over a  
239 region encompassing 100 markers.

240

#### 241 Targeted next generation sequencing (NGS) and variant calling.

242 Genomic DNA for 140 fresh/frozen DLBCL tumors were obtained from the University of Nebraska  
243 Medical Center (UNMC) lymphoma tissue bank (IRB 161-95-EP) and interrogated by targeted  
244 sequencing of a panel of 380 genes, as previously described<sup>20</sup>. In brief, 500-1,000ng of genomic  
245 DNA was sheared using a Covaris S2 instrument and libraries prepared using KAPA Hyper Prep  
246 kits (Roche) and Illumina TruSeq Adapters (Bioo Scientific) according to the manufacturer's  
247 protocol. A maximum of 6 cycles of PCR was used for library preparation. Samples were 12-  
248 plexed, subjected to hybrid capture with a 5.3Mbp Nimblegen SeqCap custom reagent (Roche),  
249 and amplified by 8 cycles of PCR. Each pool was sequenced on a single lane of an Illumina HiSeq  
250 2500 instrument in high-output mode using 100bp paired-end reads at the Hudson Alpha Institute  
251 for Biotechnology Genome Sequencing Laboratory. Raw sequencing reads were aligned to the  
252 human genome (hg19) using BWA-Mem<sup>48</sup>, realigned around InDels using GATK<sup>49</sup>, sorted and  
253 deduplicated using Picard tools, and variants were called according to a consensus between  
254 VarScan2<sup>50</sup> and GATK Unified Genotyper<sup>49</sup>. This approach has been validated to have a  
255 specificity of 92.9% and a sensitivity of 86.7%<sup>51</sup>. Average on-target rate for this dataset was 88%  
256 and average depth of coverage 623X (min = 122X, max = 1396X). Raw FASTQ files for the  
257 targeted NGS of previously published DLBCLs (n=119; European Nucleotide Archive Accession  
258 ERP021212)<sup>52</sup> and Burkitt's lymphomas<sup>20</sup> were also analyzed with the same pipeline, and the  
259 results integrated. The DNA copy number of UNMC DLBCL and Burkitt lymphoma cohorts was  
260 determined using CopyWriteR<sup>53</sup> with 200kB windows.

261

#### 262 DLBCL Cell Lines

263 The SU-DHL-2 cell line was obtained from ATCC. The RIVA (aka RI-1), HBL1, TMD8, U2932 and  
264 OCI-Ly10 cell lines were obtained from DSMZ. The DNA copy number profile of DLBCL cell lines  
265 were derived from previously reported SNP6.0 data<sup>54</sup> or targeted next generation sequencing, as  
266 described above. Cell of origin subtype was determined according to previous descriptions<sup>8</sup>.  
267 U2932, RIVA, TMD8, HBL1, and SUDHL2 were maintained in RPMI-1640 media with 10% FBS  
268 and 1% penicillin/streptomycin. OCI-LY1, OCI-LY7 and OCI-LY10 were maintained in IMDM  
269 supplemented with 20% human serum and 1% penicillin/streptomycin. Cell lines were regularly  
270 tested for mycoplasma, and identity confirmation by Short Tandem Repeat at core facility of MD



271 Anderson Cancer Center. Tetracycline-inducible expression of *TCF4* was performed in the TMD8,  
272 HBL1, and SUDHL2 cell lines. Detailed methodology can be found in the supplementary methods.  
273

#### 274 ChIP-sequencing of TCF4

275 For inducible TCF4 expression, TMD8-TCF4, or SU-DHL-2-TCF4 cell lines were treated with  
276 doxycycline (60ng/ml) for 24 hours. For chromatin immuno-precipitation, five million cells were  
277 fixed with 1% formaldehyde for 10 min, quenched by addition of 125 mM Glycine for 5 min at RT,  
278 washed with ice-cold PBS then resuspended and incubated in ice-cold ChIP buffer (10mM Tris-  
279 HCl pH 8.0, 6.0 mM EDTA, 0.5% SDS and protease inhibitor) for 1hour. In the same time, 5µg of  
280 antibodies (TCF4<sup>21</sup>) or control rabbit IgG (Cell Signaling; 2729) were allowed to bind to dynabeads  
281 Protein-G (Invitrogen; 10003D) in binding buffer (0.2% BSA, 0.1% Tween-20 in PBS) for 2 hours.  
282 Chromatin was sheared using Covaris M220. Sonicated lysates were diluted in dilution buffer  
283 (10mM Tris-HCl pH8, 140 mM NaCl, 1mM EDTA pH 8, 0.5 mM EGTA, 1% Triton X-100, and 0.1%  
284 Sodium Deoxycholate) and added to antibody bound Protein-G beads for immunoprecipitation  
285 overnight at 4°C. Note; for ChIP normalization, spike in chromatin/antibody was added to  
286 sonicated lysates (53083/61686; Active Motif). Next day, bead-bound complexes were washed 5  
287 times with RIPA buffer (1% NP40, 0.1% SDS, and 0.5% Sodium Deoxycholate in PBS), 2 times  
288 with LiCl buffer (10 mM Tris-HCl pH8, 250 mM LiCl, 0.5% NP40, 0.5% Sodium Deoxycholate, 1  
289 mM EDTA), once with TE buffer pH 8.0 and finally resuspended in 50µl of TE buffer containing  
290 20µg of proteinase K and RNase A (0.2 µg/µl). TE buffer, RNase A and proteinase K mixture was  
291 also added in total chromatin samples in parallel as input reference. Reverse cross-linking was  
292 performed at thermal cycler (4 hours 37°C, 4 hours 50°C, and overnight 65°C). DNA purification  
293 was performed with SPRIselect beads (Beckman Coulter; B23317) and further processed for  
294 library generation with KAPA HyperPrep kit (KK8502) according to the kit protocol.

295  
296 Sequencing reads were aligned to the human genome (hg19) using BWA-Mem<sup>48</sup>, realigned  
297 around InDels using GATK<sup>49</sup>, sorted and deduplicated using Picard tools. Peaks were called in  
298 TCF4 ChIP samples compared to their input control using EaSeq with global thresholding. Peaks  
299 were annotated according to the transcription start site of the nearest RefSeq gene and filtered  
300 based upon FDR (<0.1), log2ratio of TCF4 ChIP vs. isotype control (≥2.0), peaks that overlapped  
301 between TMD8 and SUDHL2, and peaks corresponding to genes with differential expression  
302 between ABC-like DLBCL tumors with or without TCF4 DNA copy number gain. Peaks within  
303 2kbp of the transcription start site were defined as ‘promoter’ peaks, those outside of the promoter  
304 region but within the coding region of the gene were defined as ‘intragenic’ peaks, and those



305 outside of these regions but within 50kbp of the transcription start site were defined as distant  
306 'enhancer' peaks. For visualization, files were converted to wiggle format and viewed using the  
307 Integrative Genomics Viewer<sup>55</sup>. The wiggle file for H3K27Ac ChIP-seq for CD20+ B-cells was  
308 downloaded directly from UCSC Genome Browser  
309 (<https://genome.ucsc.edu/ENCODE/downloads.html>). Significantly over-represented DNA  
310 sequence motifs (FDR<0.05) were identified in TCF4 ChIP-seq peaks compared to the reference  
311 genome (hg19) using CisFinder<sup>56</sup> with the default settings. Motifs with 75% homology were  
312 collapsed to motif clusters.

313

314 For ChIP-PCR, chromatin immuno-precipitation was performed with BRD4 antibody (Bethyl, Cat  
315 No. A301-985A) following the protocol as described above for TCF4. Chromatin DNA was also  
316 purified from the input samples. The purified DNA was used to perform quantitative PCR using  
317 SYBR Green/ROX qPCR Master Mix (Applied Biosystem; 4309155). Percentage of input was  
318 quantified from the adjusted input Ct values and further used to determine  $\Delta$ Ct values for BRD4  
319 or IgG ChIP. Primers used for ChIP-PCR have been listed in Table S10.

320

### 321 BET Inhibitors and Treatments

322 BRD4 inhibitors JQ1 and OTX015 were obtained from Selleck Chemicals. BRD4-PROTAC (ARV-  
323 771) was provided by Arvinas, Inc. (New Haven, CT). U2932 and RIVA cell lines were treated  
324 with indicated concentrations of BET-inhibitors (JQ1, OTX015) or BRD4-PROTAC (ARV771) for  
325 24 hours before immunoblotting. For apoptosis analysis, U2932 and RIVA cell lines were seeded  
326 at  $2.5 \times 10^5$  cells/ml and treated with ARV771 at indicated concentration for 48 hours. Cells were  
327 stained with Annexin V (Thermo Fisher; A35122)/To-PRO-3 and analyzed using flow cytometry  
328 (BD LSRFortessa) and FlowJo software. For gene expression analysis, cell lines (U2932 and  
329 RIVA) were un-treated or treated with ARV771 (50ng/ml) for 24 hours. Total RNA was extracted  
330 using All prep DNA/RNA kit (Qiagen; 80204) and RNA integrity was assessed using an Agilent-  
331 4200 TapeStation system. Libraries were generated using KAPA RNA HyperPrep kit with  
332 RiboErase (KK8560) according to the manufacturer's instructions. Libraries were pooled and run  
333 on a single lane of a HiSeq 4000 instrument at the MD Anderson Sequencing and Microarray  
334 Core Facility. Fastq files were first aligned to the GRCh37 assembly with  
335 GENCODE37lift37 annotations using STAR 2.6.0c, using a two-pass protocol with  
336 alignment parameters from the ENCODE long RNA-seq pipeline. The transcript-  
337 coordinate output files were then pre-processed with RSEM version 1.2.31's convert-

338 sam-for-rsem tool before quantifying with rsem-calculate-expression, assuming the data  
339 is from an unstranded paired-end library. Tximport version 1.6.0 was then used under R  
340 version 3.4.3 to read individual RSEM output files and aggregate to gene-level  
341 expressions based on the gene-transcript relationships in GENCODE27lift37's Gene  
342 symbol metadata. DESeq2 version 1.18.1 was used to identify differentially expressed  
343 genes using a two-variable (Cell line and Treatment) analysis with default settings. Gene  
344 set enrichment analysis<sup>57</sup> was performed using GenePattern and a list of all genes from  
345 RNA-seq ranked by the fold-change in expression following ARV771 treatment. The gene  
346 set consisted of all genes that showed significantly higher expression in ABC-like DLBCL  
347 tumors with *TCF4* DNA copy number gain compared to those without, as shown in Figure  
348 3.

#### 349 Murine Xenograft Experiments

350 *Reagents and antibodies.* ARV-771 was kindly provided by Arvinas, Inc. (New Haven, CT) D-  
351 Luciferin (potassium salt) was obtained from Gold Biotechnology, Inc. (St Louis, MO). BD Matrigel  
352 Matrix High Concentration was obtained from BD Biosciences (Franklin Lakes, NJ) (Catalog  
353 number 354248).

354  
355 *Cell lines.* Luciferase-expressing RIVA and U2932 cells were created by transducing cells with  
356 Luc-ZSGreen. pHIV-Luc-ZsGreen was a gift from Bryan Welm (Addgene plasmid # 39196). High  
357 GFP-expressing cells were isolated by flow sorting for GFP expression in the M. D. Anderson  
358 Flow Cytometry and Cellular Imaging Core Facility (FCCICF), a shared resource partially funded  
359 by NCI Cancer Center Support Grant P30CA16672.

360  
361 *In vivo studies.* All animal studies were performed under a protocol approved by the IACUC at  
362 M.D. Anderson Cancer Center, an AAALAC-accredited institution. Five million RIVA or U2932  
363 cells (mixed with Matrigel at a volume ratio of 1:1) were subcutaneously injected in the left flank  
364 of male athymic nude mice (nu/nu) (n = 8 per group). Tumor volume was calculated by the  
365  $\frac{1}{2}(\text{length} \times \text{width}^2)$  method. Treatment was initiated when the mean tumor volumes reached ~150  
366 mm<sup>3</sup>. Mice were treated with vehicle (10% [1:1 solutol: ethanol] and 90% D5-water, s.c. daily x 5  
367 days per week) or ARV-771 (30 mg/kg, s.c., daily x 5 per week). The RIVA mouse model was  
368 treated for two weeks. Due to slower tumor growth, the U2932 mouse model was treated for three  
369 weeks. For bioluminescent imaging, mice were IP-injected with 100  $\mu$ L of 75 mg/kg D-Luciferin

370 potassium salt (reconstituted in 1X PBS and sterile-filtered through a 0.2 um filter) incubated for  
371 5 minutes, anesthetized with isoflurane and imaged once per week utilizing a Xenogen IVIS-200  
372 imaging system (PerkinElmer) to monitor disease status and treatment efficacy. One mouse from  
373 each cohort was euthanized after three weeks of treatment for biomarker analysis. Mice bearing  
374 tumors greater than 1500 mm<sup>3</sup> were removed from study and humanely euthanized (carbon  
375 dioxide inhalation and cervical dislocation) according to the IACUC-approved protocol.  
376 Veterinarians and veterinary staff assisting in determining when euthanasia was required were  
377 blinded to the experimental conditions of the study. Tumor size was compared among cohorts by  
378 unpaired t-test. The survival of the mice is represented by a Kaplan Meier plot. Differences in  
379 survival were calculated by a Mantel-Cox log-rank test. P values less than 0.05 were considered  
380 significant.

381

### 382 **ACKNOWLEDGEMENTS**

383 This research was supported by the Nebraska Department of Health and Human Services (LB506  
384 2016-16, M.R.G.), the Schweitzer Family Fund (J.W.), RO1 CA210250 (K.B.) and the MD  
385 Anderson Cancer Center NCI CORE Grant (P30 CA016672). Arvinas, Inc. kindly provided ARV-  
386 771 for the studies.

387

### 388 **COMPETING INTERESTS**

389 The authors have no competing interests to declare.

390

### 391 **AVAILABILITY OF DATA**

392 The data produced in this study are available in the gene-expression omnibus  
393 ([www.ncbi.nlm.nih.gov/geo/](http://www.ncbi.nlm.nih.gov/geo/)), accession number GSE119241. The SNP and gene expression  
394 microarray accessions for the previously published data are listed in Table S1. Raw next  
395 generation sequencing data will be provided upon reasonable request to the corresponding author  
396 and the completion of confidentiality non-disclosure and material transfer agreements.

397

### 398 **AUTHOR CONTRIBUTIONS**

399 NJ, KH, ST, WF, DK and OH performed experiments. NJ, KH, ST, KB and MRG analyzed data  
400 and wrote the manuscript. MJM, AB, TH, QD, DM, CP, AG, SR, JI, FG, SSN, JW, RED and KB  
401 analyzed or interpreted data. AA and CLL provided computational resources. EH, RK, KES, GJ,  
402 RR, RDG, AR, JV, ML, and TG provided samples or data. MRG conceived and supervised the  
403 study. All authors read and approved the manuscript.

404 **REFERENCES**

- 405 1 Coiffier, B. *et al.* CHOP chemotherapy plus rituximab compared with CHOP alone in  
406 elderly patients with diffuse large-B-cell lymphoma. *The New England journal of medicine*  
407 **346**, 235-242, doi:10.1056/NEJMoa011795 (2002).
- 408 2 Armitage, J. O. How I treat patients with diffuse large B-cell lymphoma. *Blood* **110**, 29-36,  
409 doi:10.1182/blood-2007-01-041871 (2007).
- 410 3 Crump, M. *et al.* Outcomes in refractory diffuse large B-cell lymphoma: results from the  
411 international SCHOLAR-1 study. *Blood* **130**, 1800-1808, doi:10.1182/blood-2017-03-  
412 769620 (2017).
- 413 4 Neelapu, S. S. *et al.* Axicabtagene Ciloleucel CAR T-Cell Therapy in Refractory Large B-  
414 Cell Lymphoma. *The New England journal of medicine* **377**, 2531-2544,  
415 doi:10.1056/NEJMoa1707447 (2017).
- 416 5 Alizadeh, A. A. *et al.* Distinct types of diffuse large B-cell lymphoma identified by gene  
417 expression profiling. *Nature* **403**, 503-511, doi:10.1038/35000501 (2000).
- 418 6 Lenz, G. *et al.* Stromal gene signatures in large-B-cell lymphomas. *The New England*  
419 *journal of medicine* **359**, 2313-2323, doi:10.1056/NEJMoa0802885 (2008).
- 420 7 Ruminy, P. *et al.* The isotype of the BCR as a surrogate for the GCB and ABC molecular  
421 subtypes in diffuse large B-cell lymphoma. *Leukemia* **25**, 681-688,  
422 doi:10.1038/leu.2010.302 (2011).
- 423 8 Davis, R. E. *et al.* Chronic active B-cell-receptor signalling in diffuse large B-cell  
424 lymphoma. *Nature* **463**, 88-92, doi:10.1038/nature08638 (2010).
- 425 9 Lenz, G. *et al.* Oncogenic CARD11 mutations in human diffuse large B cell lymphoma.  
426 *Science* **319**, 1676-1679, doi:10.1126/science.1153629 (2008).
- 427 10 Ngo, V. N. *et al.* Oncogenically active MYD88 mutations in human lymphoma. *Nature* **470**,  
428 115-119, doi:10.1038/nature09671 (2011).
- 429 11 Morin, R. D. *et al.* Frequent mutation of histone-modifying genes in non-Hodgkin  
430 lymphoma. *Nature* **476**, 298-303, doi:10.1038/nature10351 (2011).
- 431 12 Roschewski, M., Staudt, L. M. & Wilson, W. H. Diffuse large B-cell lymphoma-treatment  
432 approaches in the molecular era. *Nature reviews. Clinical oncology* **11**, 12-23,  
433 doi:10.1038/nrclinonc.2013.197 (2014).
- 434 13 Peifer, M. *et al.* Integrative genome analyses identify key somatic driver mutations of  
435 small-cell lung cancer. *Nature genetics* **44**, 1104-1110, doi:10.1038/ng.2396 (2012).
- 436 14 Mermel, C. H. *et al.* GISTIC2.0 facilitates sensitive and confident localization of the targets  
437 of focal somatic copy-number alteration in human cancers. *Genome biology* **12**, R41,  
438 doi:10.1186/gb-2011-12-4-r41 (2011).
- 439 15 Kim, J. W. *et al.* Characterizing genomic alterations in cancer by complementary functional  
440 associations. *Nature biotechnology* **34**, 539-546, doi:10.1038/nbt.3527 (2016).
- 441 16 Monti, S. *et al.* Integrative analysis reveals an outcome-associated and targetable pattern  
442 of p53 and cell cycle deregulation in diffuse large B cell lymphoma. *Cancer cell* **22**, 359-  
443 372, doi:10.1016/j.ccr.2012.07.014 (2012).
- 444 17 Lenz, G. *et al.* Molecular subtypes of diffuse large B-cell lymphoma arise by distinct  
445 genetic pathways. *Proceedings of the National Academy of Sciences of the United States*  
446 *of America* **105**, 13520-13525, doi:10.1073/pnas.0804295105 (2008).
- 447 18 Schmitz, R. *et al.* Burkitt lymphoma pathogenesis and therapeutic targets from structural  
448 and functional genomics. *Nature* **490**, 116-120, doi:10.1038/nature11378 (2012).
- 449 19 Richter, J. *et al.* Recurrent mutation of the ID3 gene in Burkitt lymphoma identified by  
450 integrated genome, exome and transcriptome sequencing. *Nature genetics* **44**, 1316-  
451 1320, doi:10.1038/ng.2469 (2012).

- 452 20 Bouska, A. *et al.* Adult High Grade B-cell Lymphoma with Burkitt Lymphoma Signature:  
453 Genomic features and Potential Therapeutic Targets. *Blood*, doi:10.1182/blood-2017-02-  
454 767335 (2017).
- 455 21 Ceribelli, M. *et al.* A Druggable TCF4- and BRD4-Dependent Transcriptional Network  
456 Sustains Malignancy in Blastic Plasmacytoid Dendritic Cell Neoplasm. *Cancer cell* **30**,  
457 764-778, doi:10.1016/j.ccell.2016.10.002 (2016).
- 458 22 Swerdlow, S. H. *et al.* The 2016 revision of the World Health Organization classification of  
459 lymphoid neoplasms. *Blood* **127**, 2375-2390, doi:10.1182/blood-2016-01-643569 (2016).
- 460 23 Havranek, O. *et al.* Tonic B-cell receptor signaling in diffuse large B-cell lymphoma. *Blood*  
461 **130**, 995-1006, doi:10.1182/blood-2016-10-747303 (2017).
- 462 24 Young, R. M. *et al.* Survival of human lymphoma cells requires B-cell receptor  
463 engagement by self-antigens. *Proceedings of the National Academy of Sciences of the*  
464 *United States of America* **112**, 13447-13454, doi:10.1073/pnas.1514944112 (2015).
- 465 25 Phelan, J. D. *et al.* A multiprotein supercomplex controlling oncogenic signalling in  
466 lymphoma. *Nature* **560**, 387-391, doi:10.1038/s41586-018-0290-0 (2018).
- 467 26 Wang, J. Q. *et al.* Synergistic cooperation and crosstalk between MYD88L265P and  
468 mutations that dysregulate CD79B and surface IgM. *The Journal of experimental*  
469 *medicine*, doi:10.1084/jem.20161454 (2017).
- 470 27 Chapuy, B. *et al.* Molecular subtypes of diffuse large B cell lymphoma are associated with  
471 distinct pathogenic mechanisms and outcomes. *Nature medicine*, doi:10.1038/s41591-  
472 018-0016-8 (2018).
- 473 28 Engel, I. & Murre, C. The function of E- and Id proteins in lymphocyte development. *Nature*  
474 *reviews. Immunology* **1**, 193-199, doi:10.1038/35105060 (2001).
- 475 29 Wohner, M. *et al.* Molecular functions of the transcription factors E2A and E2-2 in  
476 controlling germinal center B cell and plasma cell development. *The Journal of*  
477 *experimental medicine* **213**, 1201-1221, doi:10.1084/jem.20152002 (2016).
- 478 30 Gloury, R. *et al.* Dynamic changes in Id3 and E-protein activity orchestrate germinal center  
479 and plasma cell development. *The Journal of experimental medicine* **213**, 1095-1111,  
480 doi:10.1084/jem.20152003 (2016).
- 481 31 Beguelin, W. *et al.* EZH2 is required for germinal center formation and somatic EZH2  
482 mutations promote lymphoid transformation. *Cancer cell* **23**, 677-692,  
483 doi:10.1016/j.ccr.2013.04.011 (2013).
- 484 32 Green, M. R. Chromatin modifying gene mutations in follicular lymphoma. *Blood* **131**, 595-  
485 604, doi:10.1182/blood-2017-08-737361 (2018).
- 486 33 Stathis, A. & Berton, F. BET Proteins as Targets for Anticancer Treatment. *Cancer*  
487 *discovery* **8**, 24-36, doi:10.1158/2159-8290.CD-17-0605 (2018).
- 488 34 Delmore, J. E. *et al.* BET bromodomain inhibition as a therapeutic strategy to target c-  
489 Myc. *Cell* **146**, 904-917, doi:10.1016/j.cell.2011.08.017 (2011).
- 490 35 Chapuy, B. *et al.* Discovery and characterization of super-enhancer-associated  
491 dependencies in diffuse large B cell lymphoma. *Cancer cell* **24**, 777-790,  
492 doi:10.1016/j.ccr.2013.11.003 (2013).
- 493 36 Boi, M. *et al.* The BET Bromodomain Inhibitor OTX015 Affects Pathogenetic Pathways in  
494 Preclinical B-cell Tumor Models and Synergizes with Targeted Drugs. *Clinical cancer*  
495 *research : an official journal of the American Association for Cancer Research* **21**, 1628-  
496 1638, doi:10.1158/1078-0432.CCR-14-1561 (2015).
- 497 37 Lu, J. *et al.* Hijacking the E3 Ubiquitin Ligase Cereblon to Efficiently Target BRD4.  
498 *Chemistry & biology* **22**, 755-763, doi:10.1016/j.chembiol.2015.05.009 (2015).
- 499 38 Bui, M. H. *et al.* Preclinical characterization of BET family bromodomain inhibitor ABBV-  
500 075 suggests combination therapeutic strategies. *Cancer research*, doi:10.1158/0008-  
501 5472.CAN-16-1793 (2017).



- 502 39 Sun, B. *et al.* BET protein proteolysis targeting chimera (PROTAC) exerts potent lethal  
503 activity against mantle cell lymphoma cells. *Leukemia*, doi:10.1038/leu.2017.207 (2017).
- 504 40 Pasqualucci, L. *et al.* Analysis of the coding genome of diffuse large B-cell lymphoma.  
505 *Nature genetics* **43**, 830-837, doi:10.1038/ng.892 (2011).
- 506 41 Chigrinova, E. *et al.* Two main genetic pathways lead to the transformation of chronic  
507 lymphocytic leukemia to Richter syndrome. *Blood* **122**, 2673-2682, doi:10.1182/blood-  
508 2013-03-489518 (2013).
- 509 42 Karube, K. *et al.* Integrating genomic alterations in diffuse large B-cell lymphoma identifies  
510 new relevant pathways and potential therapeutic targets. *Leukemia* **32**, 675-684,  
511 doi:10.1038/leu.2017.251 (2018).
- 512 43 Kato, M. *et al.* Frequent inactivation of A20 in B-cell lymphomas. *Nature* **459**, 712-716,  
513 doi:10.1038/nature07969 (2009).
- 514 44 Compagno, M. *et al.* Mutations of multiple genes cause deregulation of NF-kappaB in  
515 diffuse large B-cell lymphoma. *Nature* **459**, 717-721, doi:10.1038/nature07968 (2009).
- 516 45 Green, M. R. *et al.* Integrative genomic profiling reveals conserved genetic mechanisms  
517 for tumorigenesis in common entities of non-Hodgkin's lymphoma. *Genes, chromosomes*  
518 *& cancer* **50**, 313-326, doi:10.1002/gcc.20856 (2011).
- 519 46 Bodker, J. S. *et al.* Performance comparison of Affymetrix SNP6.0 and cytogenetic 2.7M  
520 whole-genome microarrays in complex cancer samples. *Cytogenet Genome Res* **139**, 80-  
521 87, doi:10.1159/000345125 (2013).
- 522 47 Reich, M. *et al.* GenePattern 2.0. *Nature genetics* **38**, 500-501, doi:10.1038/ng0506-500  
523 (2006).
- 524 48 Li, H. Aligning sequence reads, clone sequences and assembly contigs with BWA-MEM.  
525 *arXiv* **1303.3997** (2013).
- 526 49 McKenna, A. *et al.* The Genome Analysis Toolkit: a MapReduce framework for analyzing  
527 next-generation DNA sequencing data. *Genome research* **20**, 1297-1303,  
528 doi:10.1101/gr.107524.110 (2010).
- 529 50 Koboldt, D. C. *et al.* VarScan 2: somatic mutation and copy number alteration discovery  
530 in cancer by exome sequencing. *Genome research* **22**, 568-576,  
531 doi:10.1101/gr.129684.111 (2012).
- 532 51 Green, M. R. *et al.* Mutations in early follicular lymphoma progenitors are associated with  
533 suppressed antigen presentation. *Proceedings of the National Academy of Sciences of*  
534 *the United States of America* **112**, E1116-1125, doi:10.1073/pnas.1501199112 (2015).
- 535 52 Krysiak, K. *et al.* Recurrent somatic mutations affecting B-cell receptor signaling pathway  
536 genes in follicular lymphoma. *Blood* **129**, 473-483, doi:10.1182/blood-2016-07-729954  
537 (2017).
- 538 53 Kuilman, T. *et al.* CopywriteR: DNA copy number detection from off-target sequence data.  
539 *Genome biology* **16**, 49, doi:10.1186/s13059-015-0617-1 (2015).
- 540 54 Green, M. R. *et al.* Integrative analysis reveals selective 9p24.1 amplification, increased  
541 PD-1 ligand expression, and further induction via JAK2 in nodular sclerosing Hodgkin  
542 lymphoma and primary mediastinal large B-cell lymphoma. *Blood* **116**, 3268-3277,  
543 doi:10.1182/blood-2010-05-282780 (2010).
- 544 55 Robinson, J. T. *et al.* Integrative genomics viewer. *Nature biotechnology* **29**, 24-26,  
545 doi:10.1038/nbt.1754 (2011).
- 546 56 Sharov, A. A., Dudekula, D. B. & Ko, M. S. CisView: a browser and database of cis-  
547 regulatory modules predicted in the mouse genome. *DNA research : an international*  
548 *journal for rapid publication of reports on genes and genomes* **13**, 123-134,  
549 doi:10.1093/dnares/dsl005 (2006).
- 550 57 Subramanian, A. *et al.* Gene set enrichment analysis: a knowledge-based approach for  
551 interpreting genome-wide expression profiles. *Proceedings of the National Academy of*

552            *Sciences of the United States of America* **102**, 15545-15550,  
553            doi:10.1073/pnas.0506580102 (2005).  
554

555

556

557

558

559

560

561

562

563

564

565

566

567

568

569

570

571

572

573

574

575

576

577

578

579

580

581

582

583

584

585

586



587 **FIGURE LEGENDS**

588

589 **Figure 1: DNA copy number gains of 18q21.2 are the most frequent genetic alteration in**  
590 **ABC-like DLBCL. A)** GISTIC analysis of DNA copy number profiles from 1,000 DLBCL tumors  
591 identified 21 peaks of DNA copy loss (blue, left) and 20 peaks of DNA copy gain (red, right). The  
592 green line indicates the significance threshold of q-value = 0.1. **B)** The GISTIC peaks from (A)  
593 are shown with reference to their frequency in ABC-like (orange) compared to GCB-like (green)  
594 cell of origin subtypes (\*Q-value<0.1). DNA copy gains of 18q21.2 were the most frequent  
595 alteration in ABC-like DLBCL cases. **C-D)** A Kaplan-Meier plot of overall survival for patients  
596 treated with CHOP combination chemotherapy (C) or CHOP plus Rituximab (D) shows that the  
597 presence of 18q21.2 gain is associated with poor outcome. **E)** The frequency of 18q21 gains is  
598 shown relative to other somatic mutations that are significantly associated with the ABC-like  
599 DLBCL subtype. This shows that gains of 18q21 are the most frequent genetic alteration in ABC-  
600 like DLBCL. **F)** REVEALER analysis was performed to identify the set functionally-complementary  
601 genetic features that likely contribute to the ABC-like DLBCL molecular phenotype. Mutations of  
602 *MYD88* were used as the seed feature. Mutations of *IRF4*, *PIM1* and *CD79B*, and DNA copy  
603 gains of 18q21 were selected as additional features that likely also contribute to the phenotype  
604 (\*Seed feature; IC, information coefficient; CIC, conditional information coefficient).

605

606

607

608

609

610

611

612

613

614

615

616

617

618

619

620 **Figure 2: The TCF4 gene is the most significant target of 18q DNA copy number gains. A)**

621 A schematic of 18q DNA copy number gains is shown, with each line representing a single tumor  
622 and deeper shades of red indicating higher DNA copy number. The GISTIC q-value is shown at  
623 the top of the diagram and the two significant peaks are highlighted with arrows. The most  
624 statistically significant peak harbors the *TCF4* gene, while the less significant peak harbors the  
625 *BCL2* gene. However, it can be seen that in many cases the DNA copy number gains span both  
626 the *TCF4* and *BCL2* regions. **B-C)** The frequency of tumors with DNA copy number gains that  
627 include both the *TCF4* and *BCL2* genes (purple), the *TCF4* gene and not the *BCL2* gene (pink)  
628 or the *BCL2* gene and not the *TCF4* gene (yellow) are shown for all tumors (B) and for the ABC-  
629 like only (C). This shows that the majority of 18q DNA copy gains include both TCF4 and BCL2,  
630 but *TCF4* is more frequently gained independently of *BCL2* than vice versa. **D)** The gene  
631 expression level from microarrays are shown for GCB-like DLBCL (green) and ABC-like (orange)  
632 DLBCL tumors that are diploid for 18q, and for ABC-like DLBCL tumors that harbor *TCF4* DNA  
633 copy number gains (red). The expression of TCF4 is significantly higher in ABC-like DLBCL  
634 compared to GCB-like DLBCL in diploid cases and further significantly increased by DNA copy  
635 number gain. P-values are from students T-test. **E)** The protein level of TCF4 and BCL2 are shown  
636 in ABC-like DLBCL cell lines, ordered according to DNA copy number of the *TCF4* locus. Two  
637 GCB-like DLBCL cell lines are shown for reference. The ABC-like DLBCL cell lines express higher  
638 levels of TCF4 than the GCB-like cell lines and there is a visible relationship between TCF4  
639 protein abundance and DNA copy number that is less clear for BCL2. **F)** The frequency of *TCF4*  
640 DNA copy gains, *TCF3* mutation and *ID3* mutation are shown for a cohort of 108 Burkitt lymphoma  
641 tumors. Gains of the *TCF4* locus are present at the same frequency of *TCF3* mutations and are  
642 significantly mutually exclusive from *TCF3* and *ID3* mutations.

643

644

645

646

647

648

649

650

651

652

653

654 **Figure 3: TCF4 regulates IgM expression in ABC-like DLBCL. A)** Differential gene expression  
655 analysis of 110 primary ABC-like DLBCL tumors with or without *TCF4* DNA copy number gain  
656 identified a large set of genes with increased expression associated with *TCF4* gain. This included  
657 the direct targets of 18q DNA copy number gains, *TCF4* and *BCL2*, and multiple genes with an  
658 important role in the pathophysiology of DLBCL, such as *IRF4*, *MYC* and the immunoglobulin  
659 heavy chain  $\mu$  (*IGHM*), that are upregulated as a secondary effect of *TCF4* gain. ChIP-seq of  
660 *TCF4* from SUDHL2 and TMD8 cell lines showed that the majority of these genes were marked  
661 with *TCF4* binding in intragenic or distant enhancer elements, suggesting that their up-regulation  
662 may be driven by transcriptional activation by *TCF4*. **B)** The significant *TCF4* ChIP-seq peaks  
663 from SUDHL2 and TMD8 are shown, ordered from strongest (top) to weakest (bottom) signal ratio  
664 compared to the input control. Significant peaks were detected for important genes such as *MYC*  
665 and *IRF4*, but multiple *IGHM* peaks were amongst those with the highest *TCF4* binding. **C)** A  
666 violin plot shows that primary DLBCL tumors with 18q21 gain express significantly higher  
667 transcript levels of *IGHM*. **D)** Two of the *TCF4* peaks at the immunoglobulin heavy chain locus  
668 are shown for *TCF4* ChIP (blue) compared to the equivalent input control (grey). A black box  
669 indicates the significant peak. For reference, ENCODE data for H3K27 acetylation (H3K27Ac)  
670 ChIP-seq in CD20+ B-cells is shown, which support the *TCF4* bound regions as bona fide  
671 enhancer elements in B-cells. **E)** Tetracycline-induced expression of *TCF4* in ABC-like DLBCL  
672 cell lines with low *TCF4* copy number resulted in a significant increase in *IGHM* transcript  
673 compared to control cells. **F)** Tetracycline-induced expression of *TCF4* led to a marked increase  
674 in IgM protein in ABC-like DLBCL cell lines with low *TCF4* copy number. An increase in *MYC* was  
675 also observed in SUDHL2 and HBL1 cell line, but was not significant in TMD8. No change was  
676 observed for *BCL2*. The quantification of triplicate experiments is shown in Figure S5.

677

678

679

680

681

682

683

684

685

686

687 **Figure 4: BET proteolysis-targeting chimeras (PROTAC) effectively inhibit TCF4 and show**  
688 **efficacy in ABC-like DLBCL cell lines. A)** The treatment of ABC-like DLBCL cell lines with high  
689 *TCF4* DNA copy number using small molecule BET inhibitors, JQ1 and OTX015, leads to an  
690 accumulation of BRD4 but can reduce the BRD4-targets TCF4 and MYC. The BET PROTAC,  
691 ARV771, effectively degrades BRD4 and leads to a more potent reduction of TCF4 and MYC at  
692 10-fold lower doses than the small molecule inhibitors. **B)** Treatment of U2932 and RIVA cell lines  
693 with 50nM of ARV771 for 48h led to the induction of apoptosis, as measured by TOPRO3 /  
694 Annexin-V positive staining. **C)** The treatment of U2932 and RIVA cell lines with 50nM of ARV771  
695 for 24h led to broad changes in transcript levels. This included the down-regulation of known  
696 BRD4 target genes, *BCL6* and *PAX5*, as well as the down-regulation of *TCF4* and its target gene,  
697 *IGHM*. **D)** The down-regulation of IgM following treatment with ARV771 is also observed at the  
698 protein level. The quantification of triplicate experiments is shown in Figure S7. **E)** Gene set  
699 enrichment analyses are overlaid for U2932 (green) and RIVA (blue) for the set of genes that  
700 were more highly expressed in primary ABC-like tumors with TCF4 DNA copy number gain  
701 compared to those tumors without DNA copy number gain, as shown in Figure 3A. Treatment  
702 with ARV771 led to a significant and coordinate down-regulation of this TCF4-associated  
703 signature in both the U2932 and RIVA cell lines. **F-I)** Murine xenografts of the U2932 cell line  
704 were allowed to become established and then treated with 30mg/kg of ARV771 daily x 5 days per  
705 week for 3 weeks. At the end of treatment the luminescence was significantly lower in ARV771-  
706 treated mice compared to vehicle control (F, G) as a result of the significant reduction in tumor  
707 growth (H). This led to significantly prolonged survival in ARV771-treated mice. **J-M)** Murine  
708 xenografts of the RIVA cell line were allowed to become established and then treated with  
709 30mg/kg of ARV771 daily x 5 days per week for 2 weeks. At the end of treatment the  
710 luminescence was significantly lower in ARV771-treated mice compared to the vehicle control (J-  
711 K), as a result of the significant reduction in tumor growth (L). Despite the short duration of  
712 treatment, this led to a significant prolongation in survival of ARV771-treated mice (M).  
713

# Figure 1

bioRxiv preprint doi: <https://doi.org/10.1101/170605>; this version posted September 13, 2018. The copyright holder for this preprint (which was not certified by peer review) is the author/funder, who has granted bioRxiv a license to display the preprint in perpetuity. It is made available under aCC-BY-NC-ND 4.0 International license.

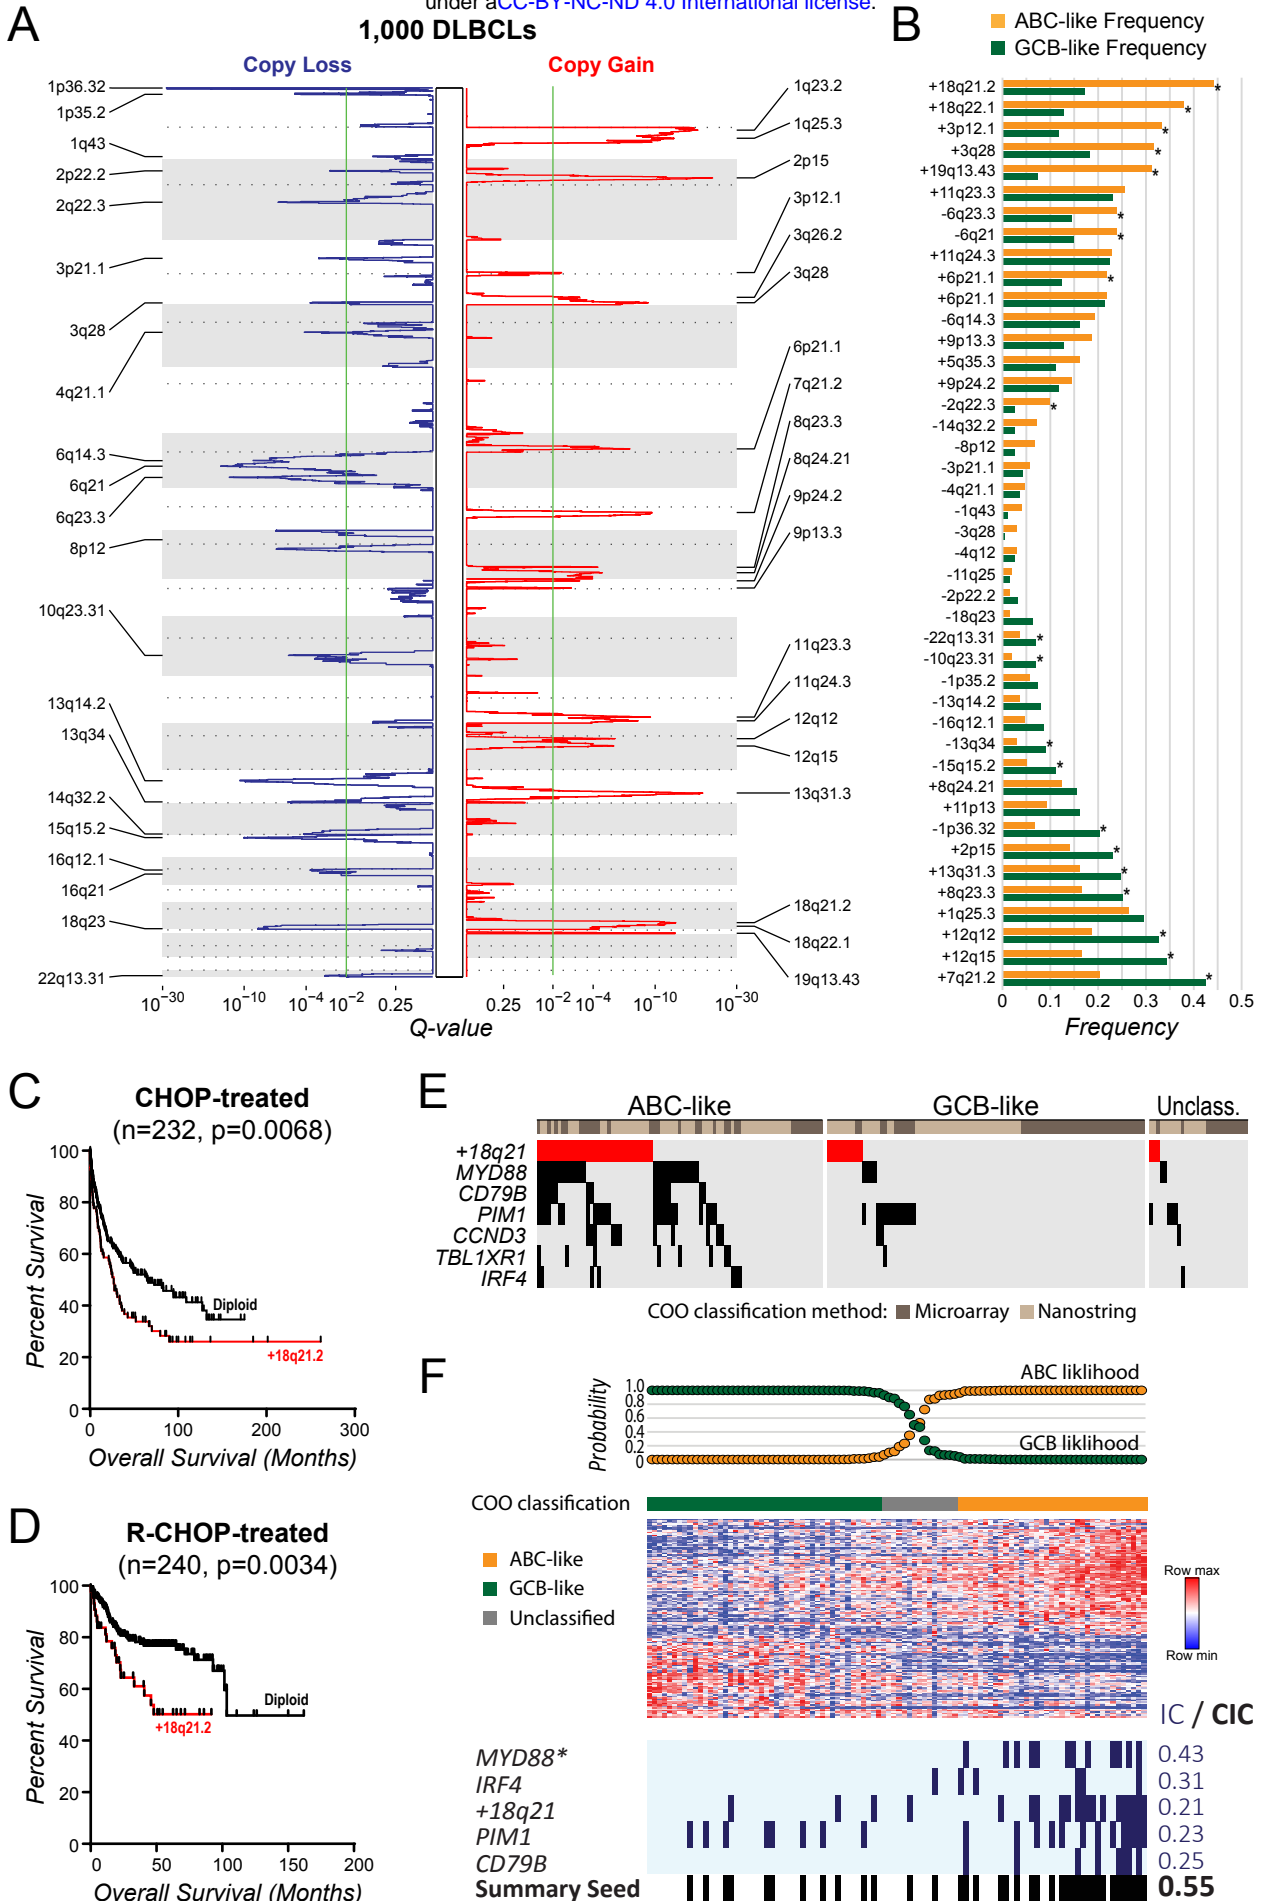

## Figure 2

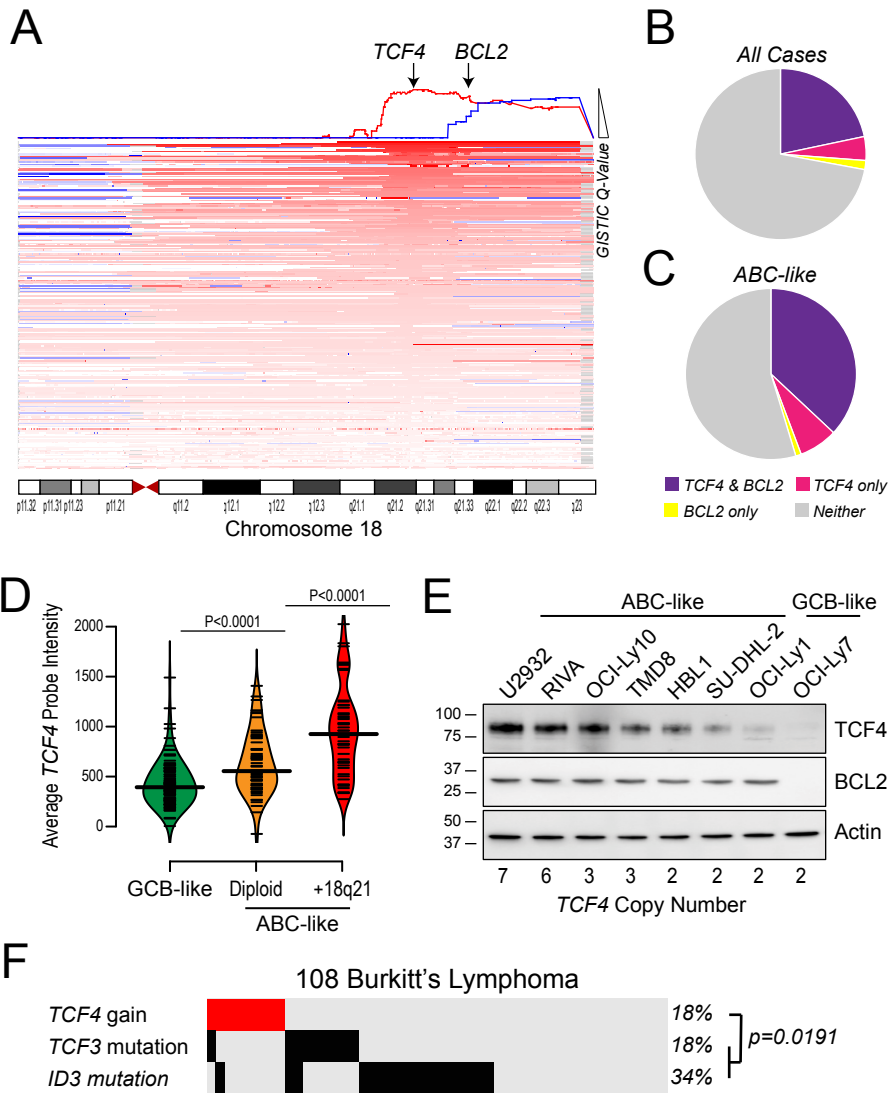

# Figure 3

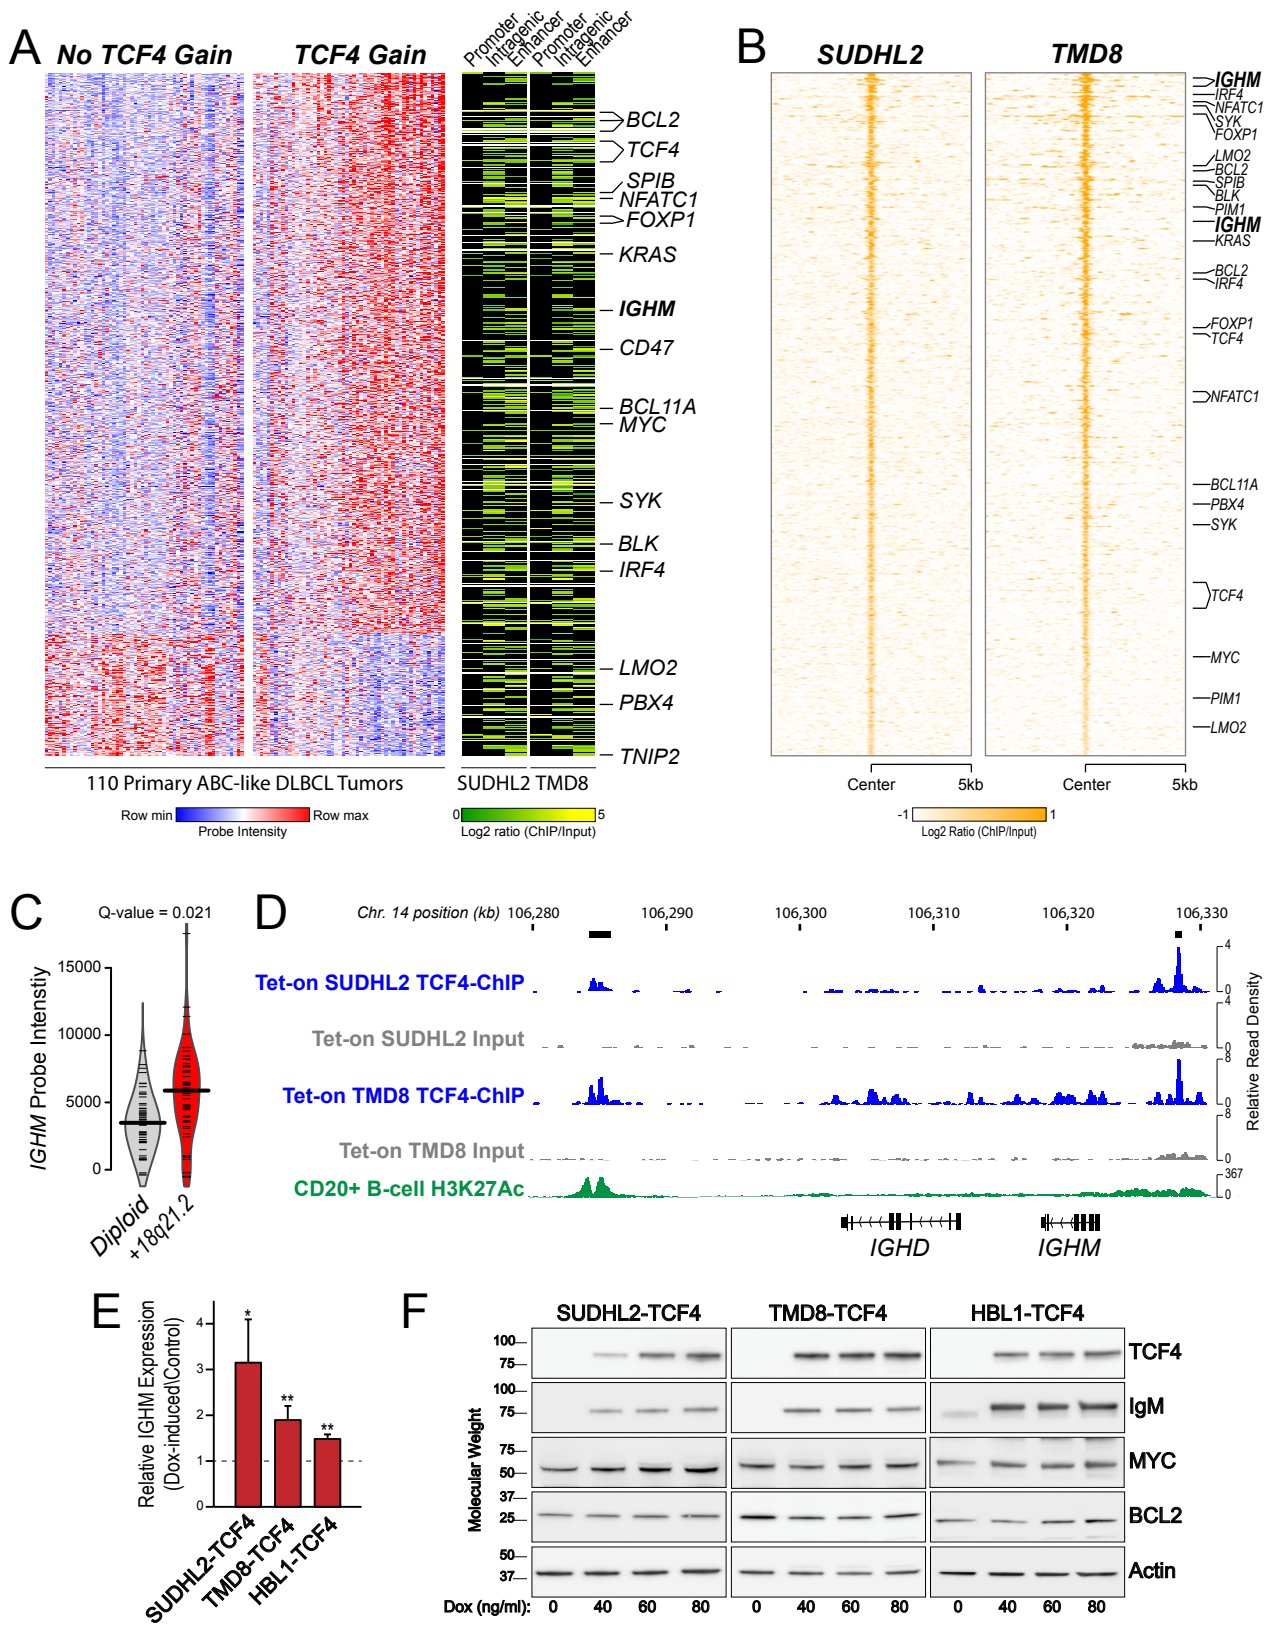



# Figure 4

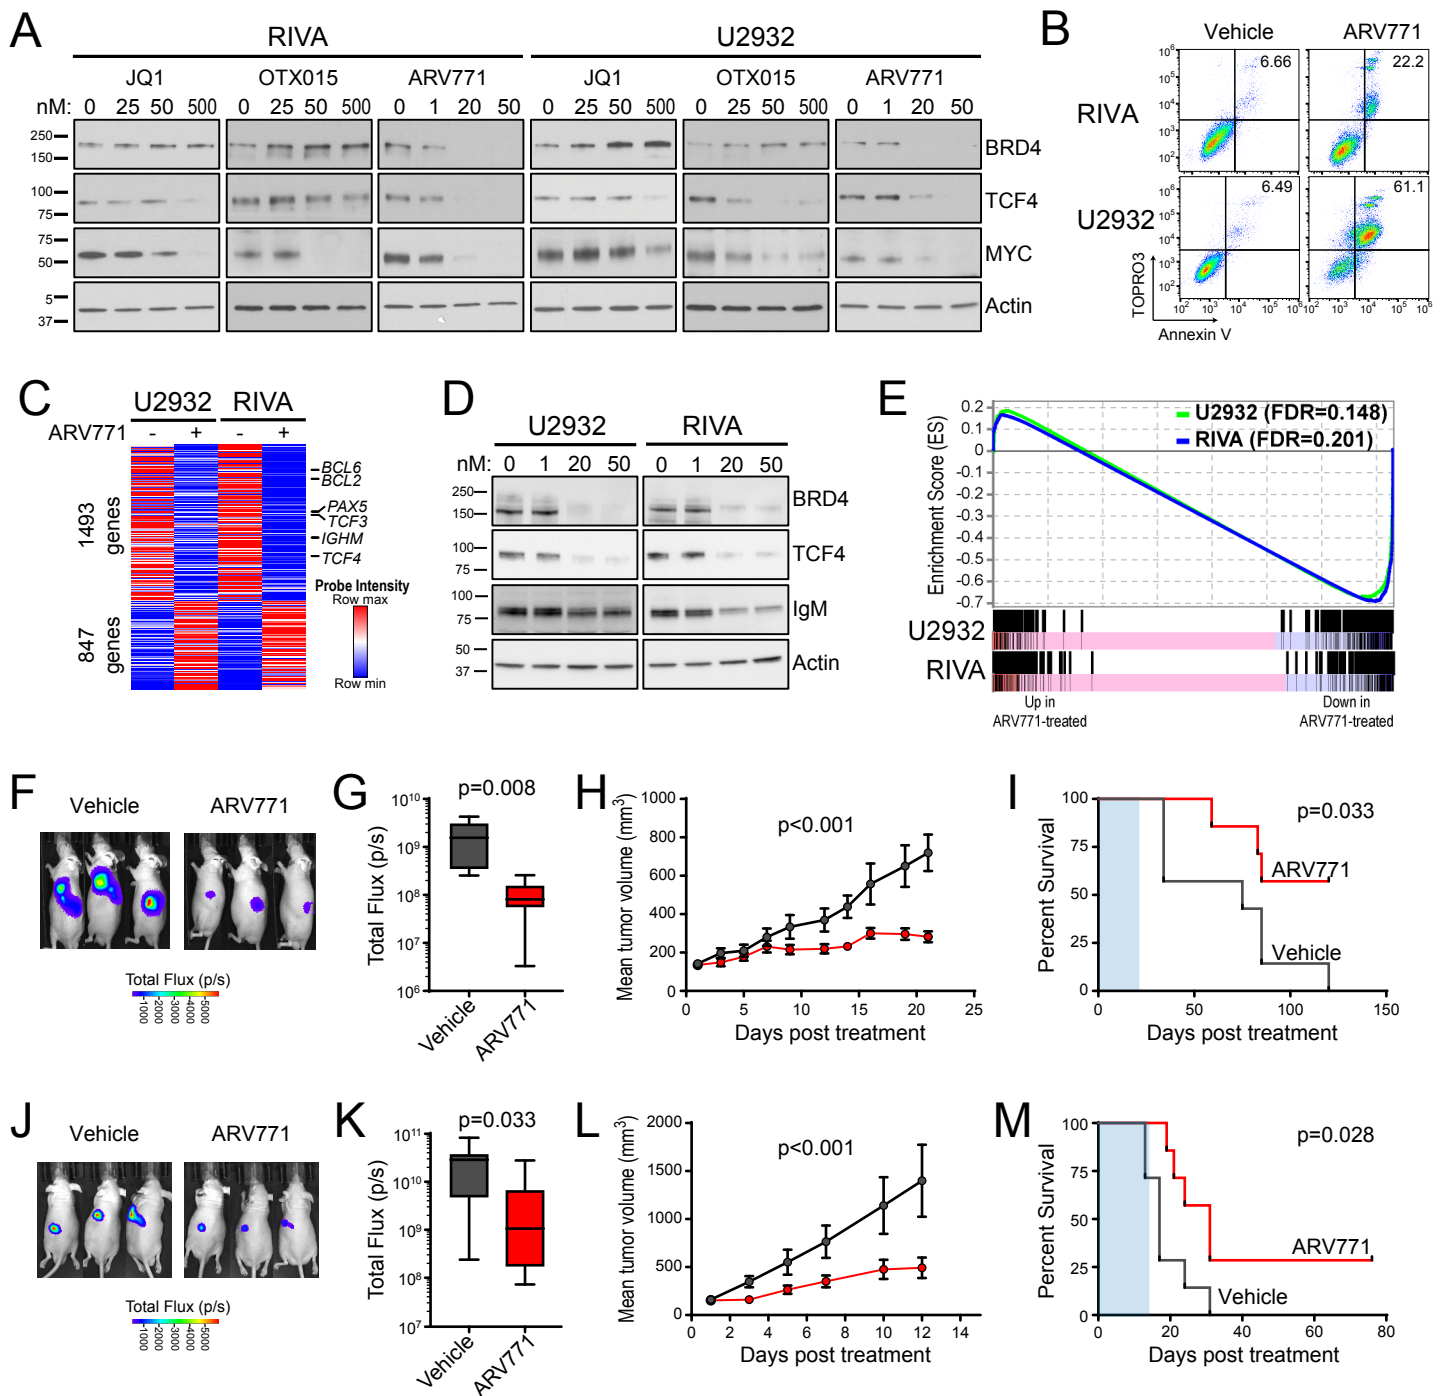

Source: http://biorxiv.org/content/10.1101/170605v2.full.pdf
